# Supplementary material
Source: PubMed Central journal article supplement (PMC2943632)
Supplement: NIHMS232592-supplement-1_si_001.pdf [file NIHMS232592-supplement-1_si_001.pdf]

## Supplemental Information for:

***E/Z* Energetics for Molecular Modeling and Design**

John P. Terhorst and William L. Jorgensen\*

**S1.** G3 results for the RCOX set. Absolute energies are in Hartrees; relative energies are in kcal/mol; dipole moments are in Debye.

| RCOX      |                                                    |             |             |             |        |
|-----------|----------------------------------------------------|-------------|-------------|-------------|--------|
| Conformer | Name                                               | G3          |             |             | $\mu$  |
|           |                                                    | E (0K)      | H (298K)    | G (298K)    |        |
| <b>1a</b> | (E)-acetic acid                                    | -228.931838 | -228.926252 | -228.958740 | 4.9709 |
| <b>1b</b> | (Z)-acetic acid                                    | -228.939935 | -228.934396 | -228.966953 | 2.0394 |
|           | $\Delta(E-Z)$                                      | 5.0809      | 5.1104      | 5.1537      | 2.9315 |
| <b>2a</b> | (E)- <i>N</i> -methylacetamide                     | -248.324810 | -248.317313 | -248.354878 | 4.5357 |
| <b>2b</b> | (Z)- <i>N</i> -methylacetamide                     | -248.328663 | -248.320855 | -248.359842 | 4.2161 |
|           | $\Delta(E-Z)$                                      | 2.4178      | 2.2226      | 3.1150      | 0.3196 |
| <b>3a</b> | (E)-methyl acetate                                 | -268.184452 | -268.177372 | -268.213970 | 5.1725 |
| <b>3b</b> | (Z)-methyl acetate                                 | -268.196380 | -268.189254 | -268.225878 | 2.0763 |
|           | $\Delta(E-Z)$                                      | 7.4849      | 7.4561      | 7.4724      | 3.0962 |
| <b>4a</b> | (E)-methyl thioacetate                             | -591.051021 | -591.043348 | -591.081698 | 4.8330 |
| <b>4b</b> | (Z)-methyl thioacetate                             | -591.058396 | -591.050414 | -591.091441 | 1.6890 |
|           | Normal mode correction ( $\Delta S$ ) <sup>a</sup> |             |             | -1.5138     |        |
|           | $\Delta(E-Z)$                                      | 4.6279      | 4.4340      | 4.6000      | 3.1440 |

<sup>a</sup> Using the freq = hindrot keyword with Gaussian 03. The correction was negligible for other structures.**S2.** G3B3 results for the RCOX set. Absolute energies are in Hartrees; relative energies are in kcal/mol; dipole moments are in Debye.

| RCOX      |                                                    |             |             |             |        |
|-----------|----------------------------------------------------|-------------|-------------|-------------|--------|
| Conformer | Name                                               | G3B3        |             |             | $\mu$  |
|           |                                                    | E (0K)      | H (298K)    | G(298K)     |        |
| <b>1a</b> | (E)-acetic acid                                    | -228.936589 | -228.930992 | -228.963546 | 4.9215 |
| <b>1b</b> | (Z)-acetic acid                                    | -228.944725 | -228.939142 | -228.971939 | 2.0048 |
|           | $\Delta(E-Z)$                                      | 5.1054      | 5.1142      | 5.2667      | 2.9167 |
| <b>2a</b> | (E)- <i>N</i> -methylacetamide                     | -248.329932 | -248.322416 | -248.360068 | 4.4763 |
| <b>2b</b> | (Z)- <i>N</i> -methylacetamide                     | -248.333663 | -248.326011 | -248.364323 | 4.1523 |
|           | $\Delta(E-Z)$                                      | 2.3412      | 2.2559      | 2.6701      | 0.3240 |
| <b>3a</b> | (E)-methyl acetate                                 | -268.190111 | -268.182912 | -268.219971 | 5.1738 |
| <b>3b</b> | (Z)-methyl acetate                                 | -268.201940 | -268.194717 | -268.231797 | 2.0738 |
|           | $\Delta(E-Z)$                                      | 7.4228      | 7.4078      | 7.4209      | 3.1000 |
| <b>4a</b> | (E)-methyl thioacetate                             | -591.055948 | -591.048174 | -591.086699 | 4.7500 |
| <b>4b</b> | (Z)-methyl thioacetate                             | -591.063320 | -591.055208 | -591.096092 | 1.5554 |
|           | Normal mode correction ( $\Delta S$ ) <sup>a</sup> |             |             | -1.5138     |        |
|           | $\Delta(E-Z)$                                      | 4.6260      | 4.4139      | 4.3804      | 3.1946 |

<sup>a</sup> Using the freq = hindrot keyword with Gaussian 03. The correction was negligible for other structures.

**S3.** G3B3 results for the RXCOYR set. Absolute energies are in Hartrees; relative energies are in kcal/mol; dipole moments are in Debye.

| RXCOYR    |                                        |             |             |             |        |
|-----------|----------------------------------------|-------------|-------------|-------------|--------|
| Conformer | Name                                   | G3B3        |             |             |        |
|           |                                        | E (0K)      | H (298K)    | G(298K)     | $\mu$  |
| <b>5a</b> | (E,Z)-1,3-dimethylurea                 | -303.653918 | -303.645230 | -303.685740 | 4.3865 |
| <b>5b</b> | (Z,Z)-1,3-dimethylurea                 | -303.655604 | -303.646871 | -303.687471 | 3.8872 |
|           | $\Delta(E-Z)$                          | 1.0580      | 1.0297      | 1.0862      | 0.4993 |
| <b>6a</b> | (E,Z)-1,3-dimethylthiourea             | -626.502965 | -626.493760 | -626.536024 | 6.0248 |
| <b>6b</b> | (Z,Z)-1,3-dimethylthiourea             | -626.502696 | -626.493610 | -626.535140 | 5.2256 |
|           | $\Delta(E-Z)$                          | -0.1688     | -0.0941     | -0.5547     | 0.7992 |
| <b>7a</b> | (Z,E)-methyl <i>N</i> -methylcarbamate | -323.514800 | -323.506452 | -323.546275 | 5.5563 |
| <b>7b</b> | (Z,Z)-methyl <i>N</i> -methylcarbamate | -323.526711 | -323.518088 | -323.559316 | 2.5102 |
|           | $\Delta(E-Z)$                          | 7.4743      | 7.3017      | 8.1834      | 3.0461 |
| <b>8a</b> | (E,Z)-methyl <i>N</i> -methylcarbamate | -323.524732 | -323.516259 | -323.556523 | 2.8532 |
| <b>8b</b> | (Z,Z)-methyl <i>N</i> -methylcarbamate | -323.526711 | -323.518088 | -323.559316 | 2.5102 |
|           | $\Delta(E-Z)$                          | 1.2418      | 1.1477      | 1.7526      | 0.3430 |
| <b>9a</b> | (Z,E)-dimethylcarbonate                | -343.384774 | -343.376814 | -343.415710 | 3.9735 |
| <b>9b</b> | (Z,Z)-dimethylcarbonate                | -343.389595 | -343.381571 | -343.420638 | 0.3722 |
|           | $\Delta(E-Z)$                          | 3.0252      | 2.9851      | 3.0924      | 3.6013 |

**S4.** G3B3 results for the C=C&N set. Absolute energies are in Hartrees; relative energies are in kcal/mol; dipole moments are in Debye.

|            |                                               | C=C&N       |             |             |         |
|------------|-----------------------------------------------|-------------|-------------|-------------|---------|
| Conformer  | Name                                          | G3B3        |             |             |         |
|            |                                               | E (0K)      | H (298K)    | G(298K)     | $\mu$   |
| <b>10a</b> | (E)- <i>N</i> -methyl-1-propen-2-amine        | -212.370739 | -212.363239 | -212.400080 | 1.3968  |
| <b>10b</b> | (Z)- <i>N</i> -methyl-1-propen-2-amine        | -212.374990 | -212.367465 | -212.404229 | 1.5223  |
|            | $\Delta$ ( <i>E-Z</i> )                       | 2.6675      | 2.6519      | 2.6035      | -0.1255 |
| <b>11a</b> | (E)-2-methoxy-1-propene                       | -232.232764 | -232.225401 | -232.262204 | 2.0171  |
| <b>11b</b> | (Z)-2-methoxy-1-propene                       | -232.239885 | -232.232750 | -232.268590 | 0.7430  |
|            | $\Delta$ ( <i>E-Z</i> )                       | 4.4685      | 4.6116      | 4.0073      | 1.2741  |
| <b>12a</b> | cis-(E)- <i>N,N'</i> -dimethylacetimidamide   | -267.699125 | -267.690146 | -267.730679 | 3.3513  |
| <b>12b</b> | cis-(Z)- <i>N,N'</i> -dimethylacetimidamide   | -267.692648 | -267.683687 | -267.724386 | 3.0451  |
|            | $\Delta$ ( <i>E-Z</i> )                       | -4.0644     | -4.0531     | -3.9489     | 0.3062  |
| <b>13a</b> | trans-(E)- <i>N,N'</i> -dimethylacetimidamide | -267.695834 | -267.686733 | -267.728033 | 2.4928  |
| <b>13b</b> | trans-(Z)- <i>N,N'</i> -dimethylacetimidamide | -267.700824 | -267.691508 | -267.733511 | 2.5329  |
|            | $\Delta$ ( <i>E-Z</i> )                       | 3.1313      | 2.9964      | 3.4375      | -0.0401 |
| <b>14a</b> | trans-(E)-1-ethylidene-2-methylhydrazine      | -228.394201 | -228.386696 | -228.423560 | 1.9430  |
| <b>14b</b> | trans-(Z)-1-ethylidene-2-methylhydrazine      | -228.393951 | -228.386650 | -228.423000 | 1.9544  |
|            | $\Delta$ ( <i>E-Z</i> )                       | -0.1569     | -0.0289     | -0.3514     | -0.0114 |
| <b>15a</b> | cis-(E)-1-ethylidene-2-methylhydrazine        | -228.393665 | -228.386214 | -228.423168 | 2.2405  |
| <b>15b</b> | cis-(Z)-1-ethylidene-2-methylhydrazine        | -228.388413 | -228.381095 | -228.417941 | 1.8734  |
|            | $\Delta$ ( <i>E-Z</i> )                       | -3.2957     | -3.2122     | -3.2800     | 0.3671  |
| <b>16a</b> | (E)-1-methyl-2-(propan-2-ylidene)hydrazine    | -267.673477 | -267.664521 | -267.705040 | 2.1509  |
| <b>16b</b> | (Z)-1-methyl-2-(propan-2-ylidene)hydrazine    | -267.669435 | -267.660641 | -267.700761 | 1.6153  |
|            | $\Delta$ ( <i>E-Z</i> )                       | -2.5364     | -2.4347     | -2.6851     | 0.5356  |
| <b>17a</b> | (E)-propanone oxime                           | -248.268305 | -248.260823 | -248.298122 | 1.3071  |
| <b>17b</b> | (Z)-propanone oxime                           | -248.258680 | -248.251256 | -248.287997 | 4.2439  |
|            | $\Delta$ ( <i>E-Z</i> )                       | -6.0398     | -6.0034     | -6.3535     | -2.9368 |
| <b>18a</b> | (E)- <i>O</i> -methyl propanone oxime         | -287.524908 | -287.516510 | -287.556573 | 1.1673  |
| <b>18b</b> | (Z)- <i>O</i> -methyl propanone oxime         | -287.494511 | -287.487278 | -287.524057 | 3.8296  |
|            | $\Delta$ ( <i>E-Z</i> )                       | -19.0744    | -18.3434    | -20.4041    | -2.6623 |
